# Supplementary material for: Soil Microbiome Influences on Seedling Establishment and Growth of Prosopis chilensis and Prosopis tamarugo from Northern Chile
Source: MDPI journal article supplement (doi:10.3390/plants11202717), 2022-10-14
Supplement: s1 [file s1]

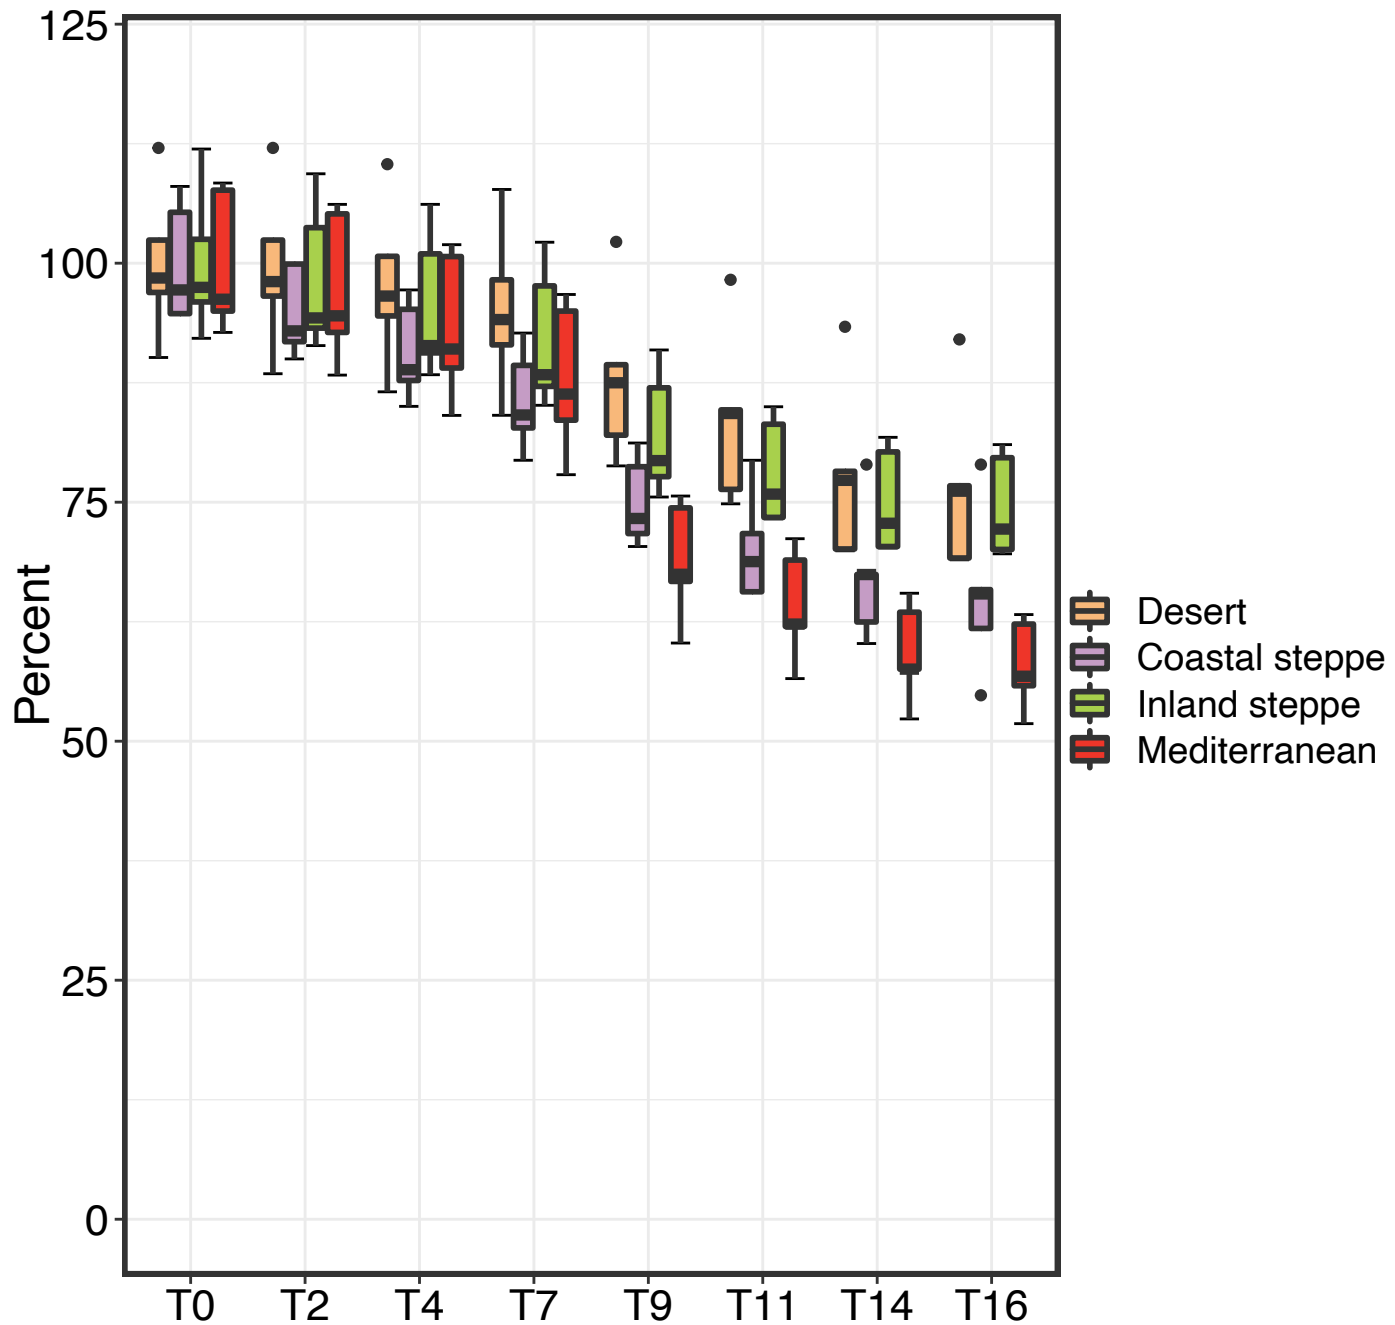

**Fig. S2** Soil water holding capacity (in percentage) across 16 days of test. Samples colored by soil type
