# Supplementary material for: Soil Microbiome Influences on Seedling Establishment and Growth of Prosopis chilensis and Prosopis tamarugo from Northern Chile
Source: MDPI journal article supplement (doi:10.3390/plants11202717), 2022-10-14
Supplement: s1 [file s1]

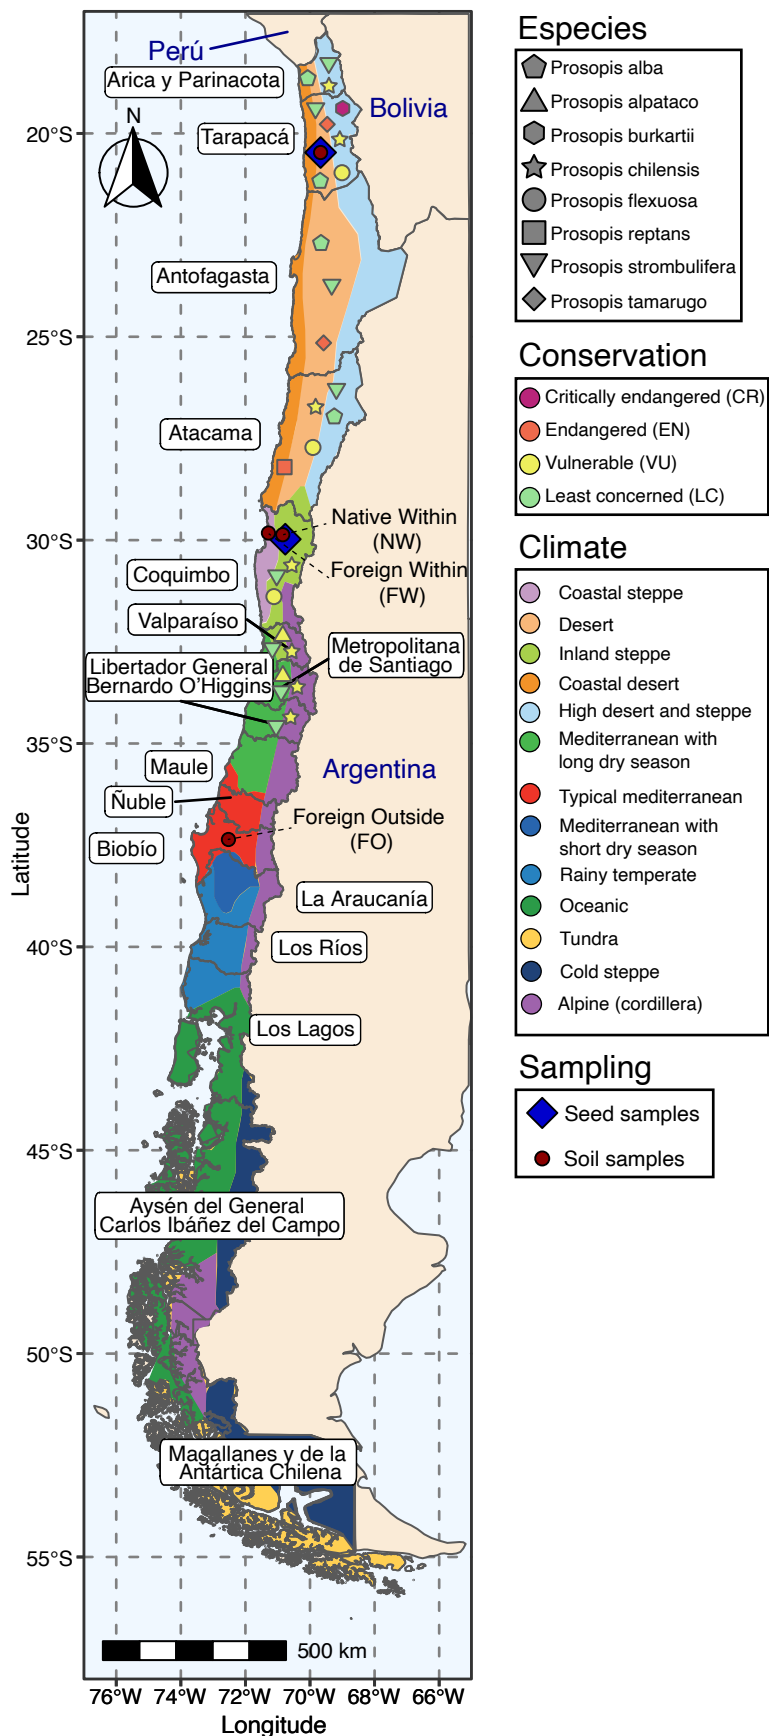

**Fig. S1** Map of Chile showing *Prosopis* species distribution and conservation status. Climate throughout Chile is depicted by different coloring across the regions. Region names in white boxes. Seed sampling locations are shown as a blue diamond and soil sampling locations as red dots. Conservation status taken from <http://espe-cies.mma.gob.cl>
